# Supplementary material for: A ‘Defective’ Conjugated Porous Poly-Azo as Dual Photocatalyst
Source: MDPI journal article supplement (doi:10.3390/catal11091064), 2021-08-31
Supplement: s1 [file s1]

Supporting information for

**A '*Defective*' Conjugated Porous Poly-Azo as Multifunctional Photocatalyst**

Ipsita Nath<sup>1,2\*</sup>, Jeet Chakraborty<sup>1,2\*</sup>, Sara Abednatanzi<sup>1</sup>, Pascal Van Der Voort<sup>1\*</sup>

<sup>1</sup>Department of Chemistry, Center for Ordered Materials, Organometallics and Catalysis (COMOC), Ghent University, 9000 Ghent, Belgium

<sup>2</sup>Eco-Friendly Applied Materials Laboratory (EFAML), Materials Science Centre, Department of Chemical Sciences, Indian Institute of Science Education and Research-Kolkata, West Bengal, India, 741246

\* Corresponding author(s): Pascal.VanDerVoort@UGent.be (PVDV); ipsita.nath@hotmail.com (IN); jeet.chakraborty@hotmail.com (JC)

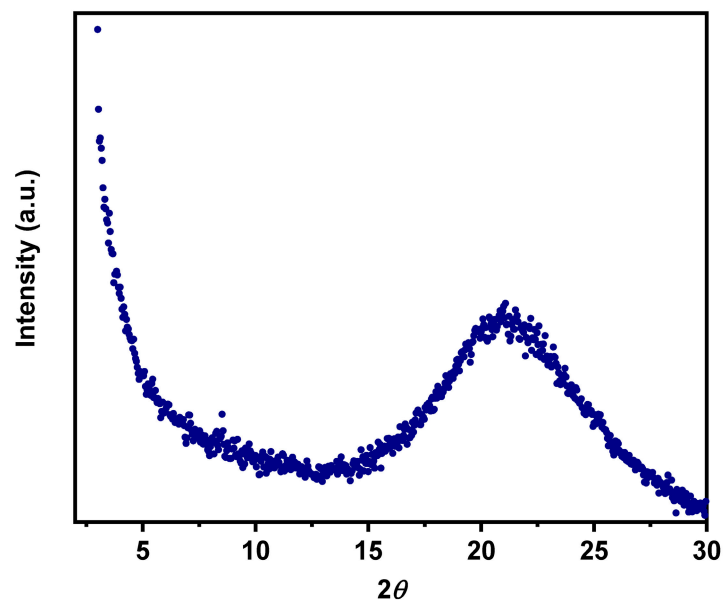

**Figure S1.** XRD pattern of AzoCPP showing the innate long-range structural disorder and amorphous nature.

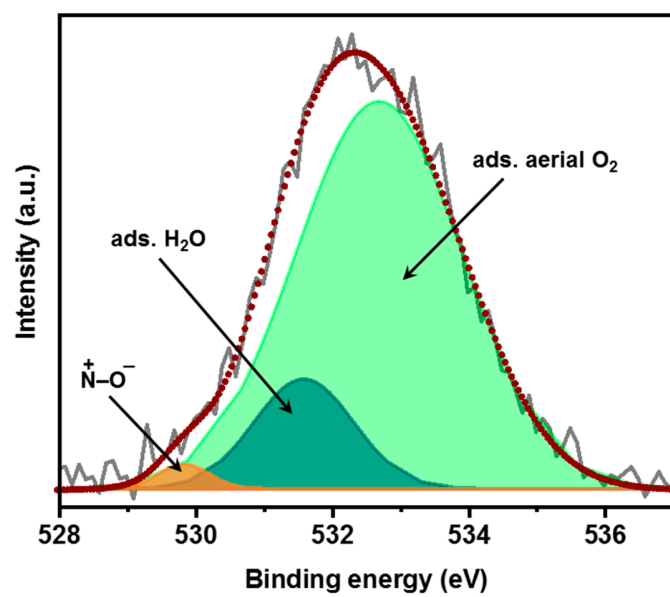

**Figure S2.** Deconvolution of O1s XPS pattern.

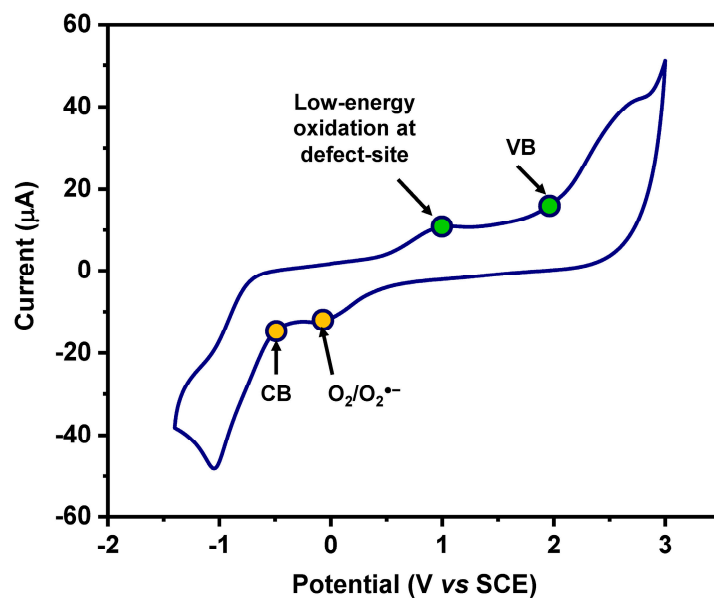

**Figure S3.** CV of AzoCPP. The VB and CB edge potentials were calculated from the redox onsets. Another set of oxidation and reduction peak can be perceived from the plot. The low-energy oxidation peak can be ascribed to the low oxidation potential of the inherent defect site, whereas the reduction peak was obtained due to mono-reduction of O<sub>2</sub> to superoxide.

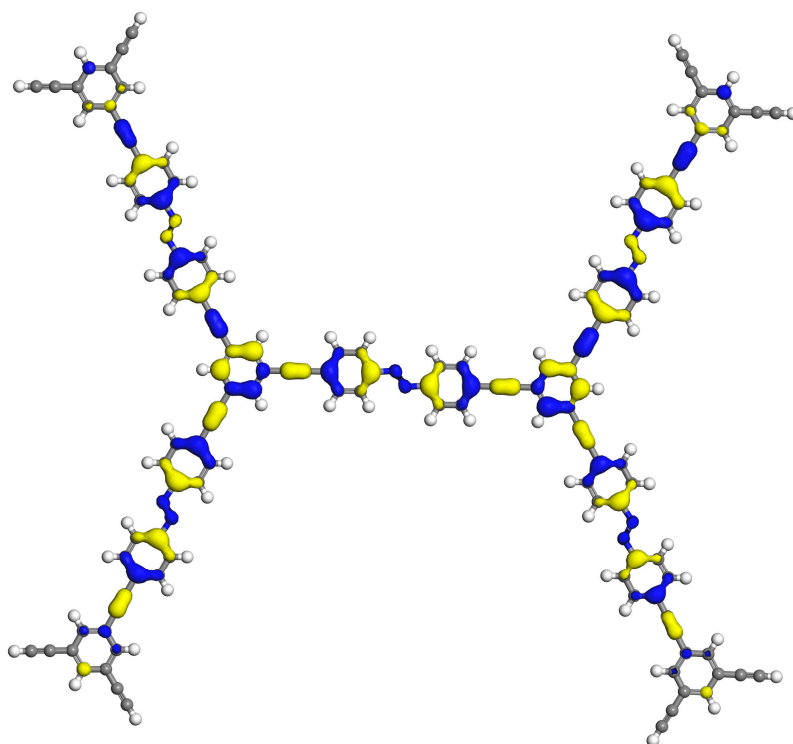

**Figure S4.** Theoretically obtained HOMO distribution in conjugated AzoCPP skeleton showing an extended through-plane electronic conduction.

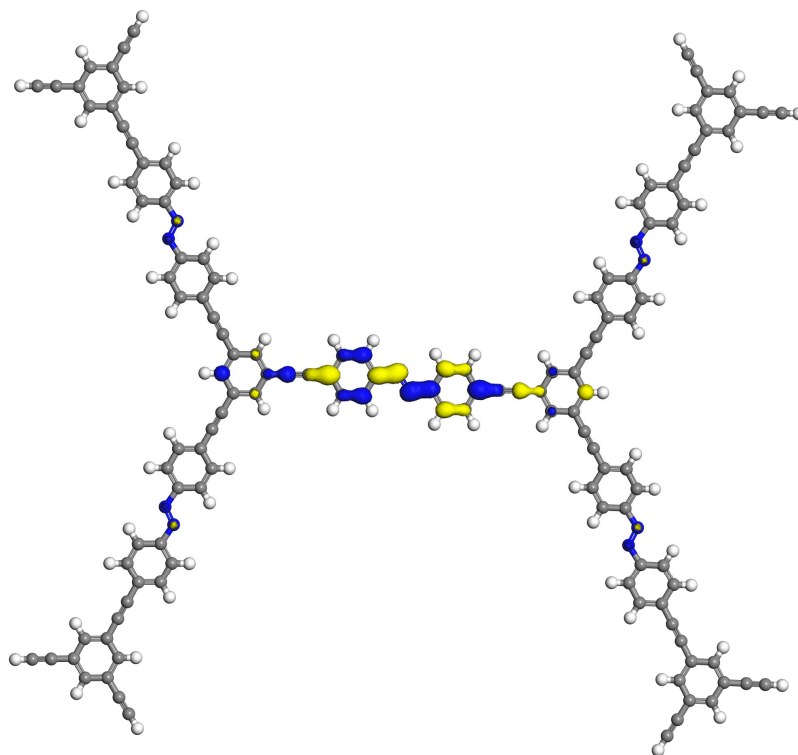

**Figure S5.** Theoretically obtained LUMO distribution in conjugated AzoCPP skeleton showing the excited non-bonding orbital centering on the azobenzene core.

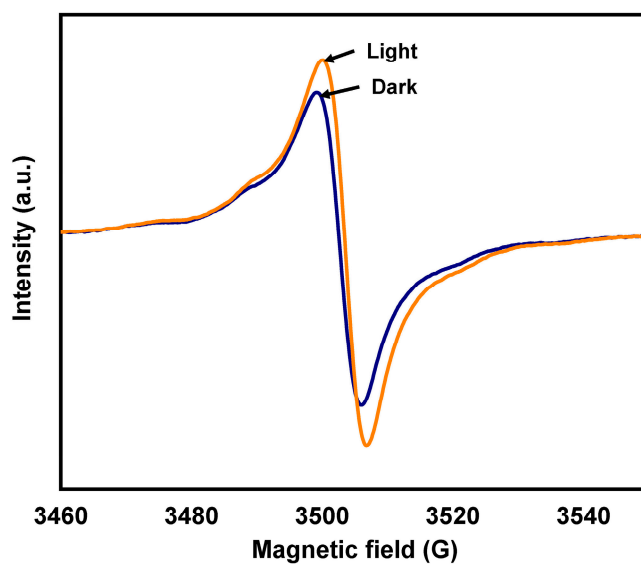

**Figure S6.** EPR pattern of AzoCPP in dark (blue) and under visible light illumination (orange).

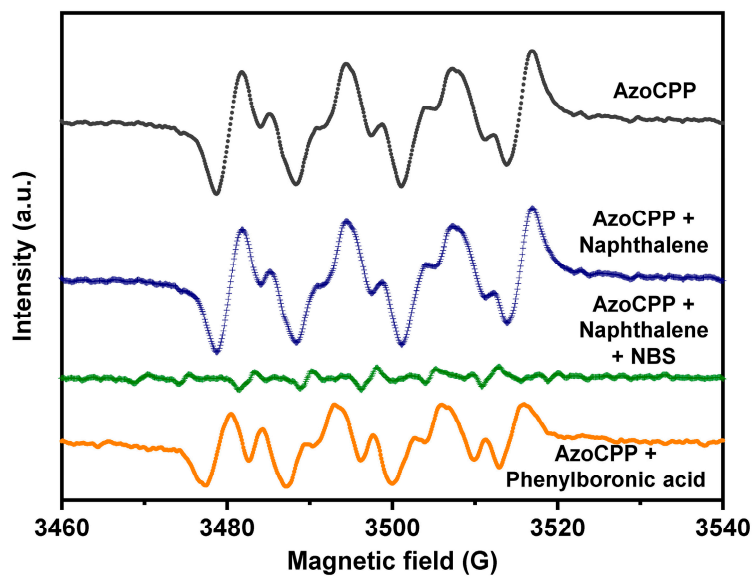

**Figure S7.** EPR pattern of the DMPO-superoxide adduct obtained under various situations.

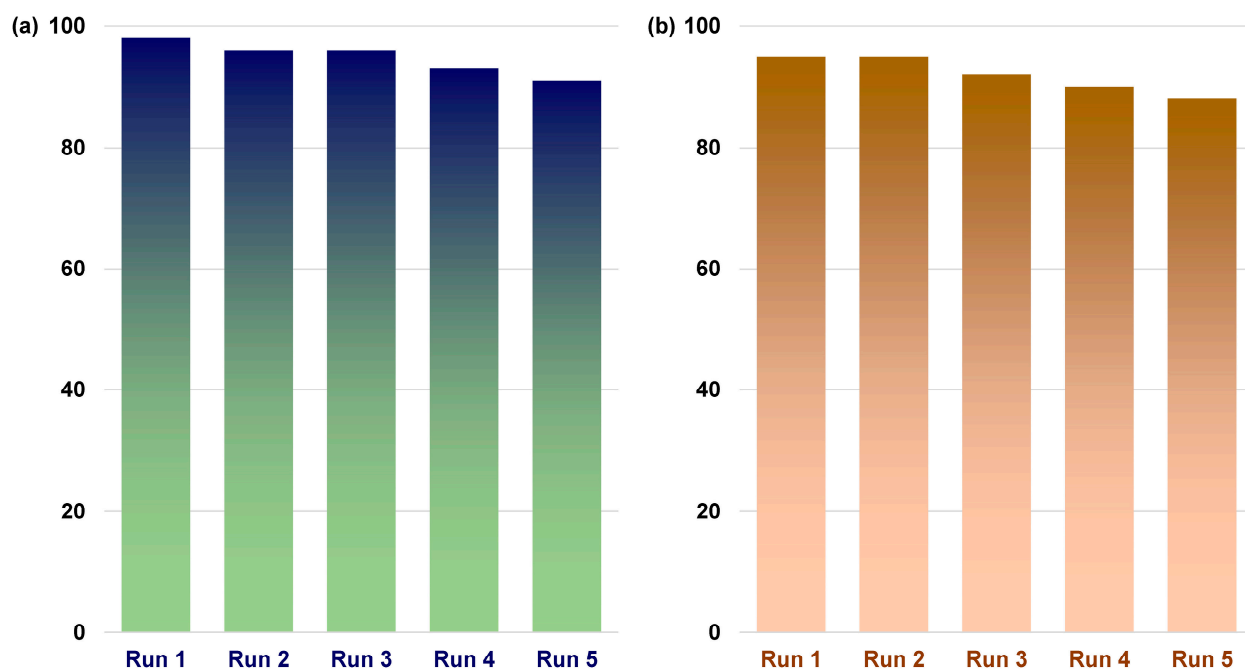

**Figure S8.** Recyclability test of AzoCPP for (a) oxidative bromination and (b) dehydroxylation of boronic acid. For oxidative bromination, naphthalene was used as the test substrate, whereas phenylboronic acid was chosen for dehydroxylation reaction.

**Table S1.** Screening conditions for photocatalytic bromination.<sup>a</sup>

| Entry | NBS (equiv.) | Solvent                  | Solvent volume (mL) | Yield (%) |
|-------|--------------|--------------------------|---------------------|-----------|
| 1     | 1            | DMF                      | 2                   | 35        |
| 2     | 1.5          | DMF                      | 2                   | 43        |
| 3     | 2            | DMF                      | 2                   | 55        |
| 4     | 2            | DMF/water (1:1)          | 2                   | 58        |
| 5     | 2            | Methanol                 | 2                   | 35        |
| 6     | 2            | THF                      | 2                   | 52        |
| 7     | 2            | Chloroform               | 2                   | 21        |
| 8     | 2            | 1,2-Dichloroethane       | 2                   | 18        |
| 9     | 2            | Acetonitrile             | 2                   | 82        |
| 10    | 2            | Acetonitrile/water (1:1) | 2                   | 89        |
| 11    | 1.5          | Acetonitrile/water (1:1) | 2                   | 87        |
| 12    | 1            | Acetonitrile/water (1:1) | 2                   | 78        |
| 13    | 1            | Acetonitrile/water (1:1) | 3                   | 74        |
| 14    | 1.5          | Acetonitrile/water (1:1) | 1.5                 | 90        |
| 15    | 1.5          | Acetonitrile/water (2:1) | 1.5                 | 94        |
| 16    | 2            | Acetonitrile/water (2:1) | 1.5                 | 98        |

<sup>a</sup>Screening condition: Naphthalene, 0.1 mmol; AzoCPP, 5 mg; 400 nm lamp; air atmosphere.

**Table S2.** Control experiments for photocatalytic bromination.

| Entry | Reaction condition           | Yield (%) |
|-------|------------------------------|-----------|
| 1     | Standard                     | 98        |
| 2     | Without AzoCPP               | N.D.      |
| 3     | In dark                      | 12        |
| 4     | In N <sub>2</sub> atmosphere | 18        |

**Table S3.** Screening conditions for photocatalytic dehydroxylation of boronic acids.<sup>a</sup>

| Entry | Hole scavenger (equiv.)   | Solvent                  | Solvent volume (mL) | Yield (%) |
|-------|---------------------------|--------------------------|---------------------|-----------|
| 1     | Triethylamine (1)         | DMF                      | 1.5                 | 48        |
| 5     | Triethylamine (1)         | Methanol                 | 1.5                 | 33        |
| 6     | Triethylamine (1)         | THF                      | 1.5                 | 52        |
| 7     | Triethylamine (1)         | Chloroform               | 1.5                 | 25        |
| 8     | Triethylamine (1)         | 1,2-Dichloroethane       | 1.5                 | 34        |
| 9     | Triethylamine (1)         | Acetonitrile             | 1.5                 | 69        |
|       | Diisopropylethylamine (1) | Acetonitrile             | 2                   | 74        |
|       | Hantzsch ester (1)        | Acetonitrile             | 2                   | 86        |
| 10    | Hantzsch ester (1.5)      | Acetonitrile/water (1:1) | 2                   | 87        |
| 11    | Hantzsch ester (2)        | Acetonitrile/water (1:1) | 2                   | 86        |
| 12    | Hantzsch ester (1.5)      | Acetonitrile/water (2:1) | 2                   | 90        |
| 13    | Hantzsch ester (1.5)      | Acetonitrile/water (3:1) | 2                   | 92        |
| 14    | Hantzsch ester (1.5)      | Acetonitrile/water (4:1) | 2                   | 95        |

<sup>a</sup>Screening condition: Phenylboronic acid, 0.1 mmol; AzoCPP, 5 mg; 400 nm lamp; O<sub>2</sub> atmosphere.

**Table S4.** Control experiments for photocatalytic dehydroxylation of boronic acids to alcohols.

| Entry | Reaction condition           | Yield (%) |
|-------|------------------------------|-----------|
| 1     | Standard                     | 95        |
| 2     | Without AzoCPP               | N.D.      |
| 3     | In dark                      | 7         |
| 4     | In N <sub>2</sub> atmosphere | N.D.      |
| 5     | Without Hantzsch ester       | trace     |
