# Supplementary material for: A ‘Defective’ Conjugated Porous Poly-Azo as Dual Photocatalyst
Source: MDPI journal article supplement (doi:10.3390/catal11091064), 2021-08-31
Supplement: s1 [file s1]

Archive with 1 entries (1 files):
- catalysts-1358204-supplementary.pdf
